# Supplementary material for: Contributions of Regional Transport Versus Local Emissions and Their Retention Effects During PM2.5 Pollution Under Various Stable Weather in Shanghai
Source: Frontiers journal article supplement (doi:10.3389/fenvs.2022.858685), 2022-03-28
Supplement: Data_Sheet_1.docx [file Data_Sheet_1.docx]

| Table S1. Simulation Schemes of WRF-CMAQ | | | | | | |
| --- | --- | --- | --- | --- | --- | --- |
| Simulation  schemes | Emission inventory (Domain3) | | Initial Field | | Boundary Field | |
| Period  Ⅰ | Period  Ⅱ | Period Ⅰ | Period Ⅱ | Period Ⅰ | Period Ⅱ |
| 1 | √ | √ | √ | √ | √ | √ |
| 2 | × | √ | √ | √ | √ | √ |
| 3 | √ | × | √ | √ | √ | √ |
| 4 |  | × |  | √ |  | √ |
| 5 |  | × |  | × |  | √ |
| 6 |  | × |  | √ |  | × |

(notes: the yes represents addition, the no represents no addition, and the blank represents no simulation)

Table S2. Error statistics of different pollutants in February and September

| Month | Parameter | RMSE | MFB | MFE |
| --- | --- | --- | --- | --- |
|  | Temperature | 3.08 | -0.03 | 0.24 |
|  | Wind Speed | 1.87 | 0.26 | 0.35 |
| February | SO2 | 7.27 | -0.11 | 0.31 |
|  | NOx | 26.72 | 0.03 | 0.23 |
|  | PM2.5 | 38.51 | -0.36 | 0.4 |
|  | O3 | 29 | -0.13 | 0.26 |
|  | Temperature | 1.84 | 0.01 | 0.04 |
|  | Wind Speed | 1.93 | 0.24 | 0.33 |
| September | SO2 | 4.83 | 0.03 | 0.27 |
|  | NOx | 22.9 | -0.01 | 0.25 |
|  | PM2.5 | 22.94 | -0.42 | 0.45 |
|  | O3 | 45.86 | -0.26 | 0.35 |

Root mean square error（RMSE），mean fractional bias (MFB) 和mean fractional error (MFE)：

In the formula：

———Simulated Value

———Observed Value;

———effective sample size

Reasonable range：MFB≤±0. 6，MFE≤0. 75；

Ideal level range：MFB≤±0.3，MFE ≤0.5

Table S3 WRF and CMAQ modal configurations

| Modal Key Parameters | Parametric solutions |
| --- | --- |
| Long-wave radiation | RRTMG |
| Short-wave radiation | RRTMG |
| Cumulus | Grell-3 |
| Boundary Layer | YSU |
| Land surface | Noah |
| Microphysics | Morrison2-mom |
| Gas phase chemistry mechanism | CB05 |
| Aerosol Program | MADE/SORGAM |


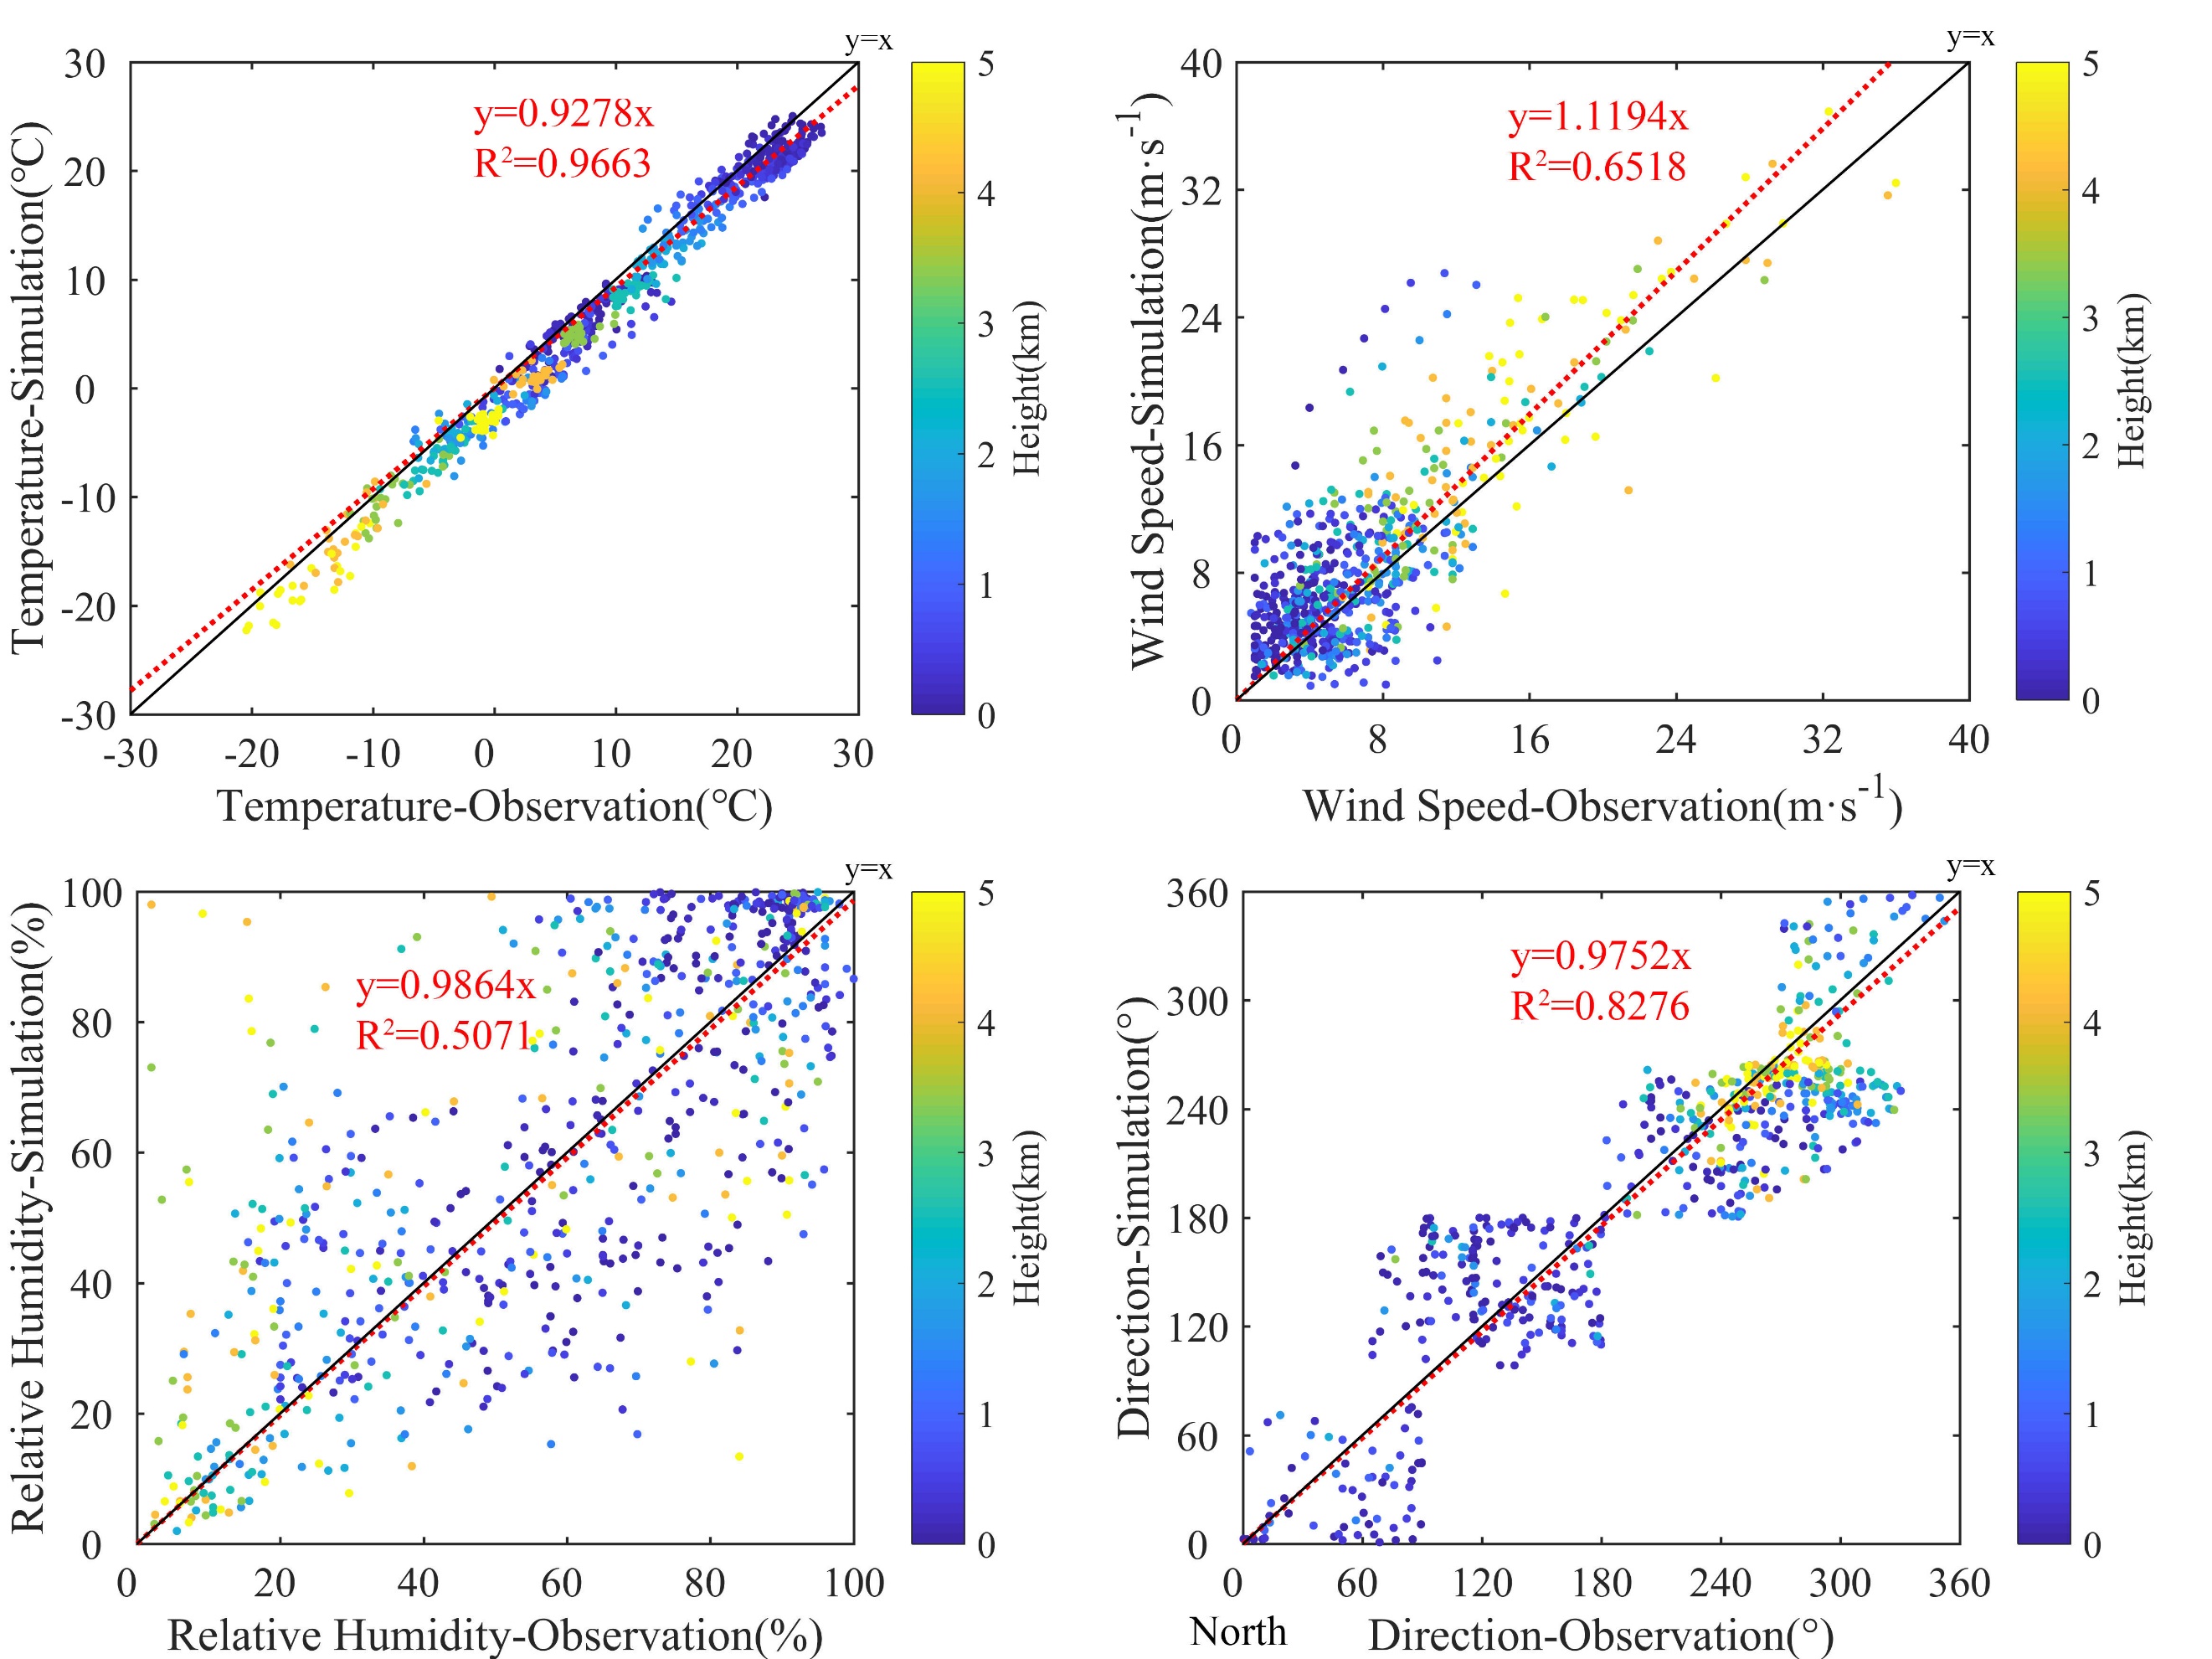


Fig. S1. Scatter plot of simulated and observed vertical Temperature, wind speed, relative humidity, and wind direction in Shanghai


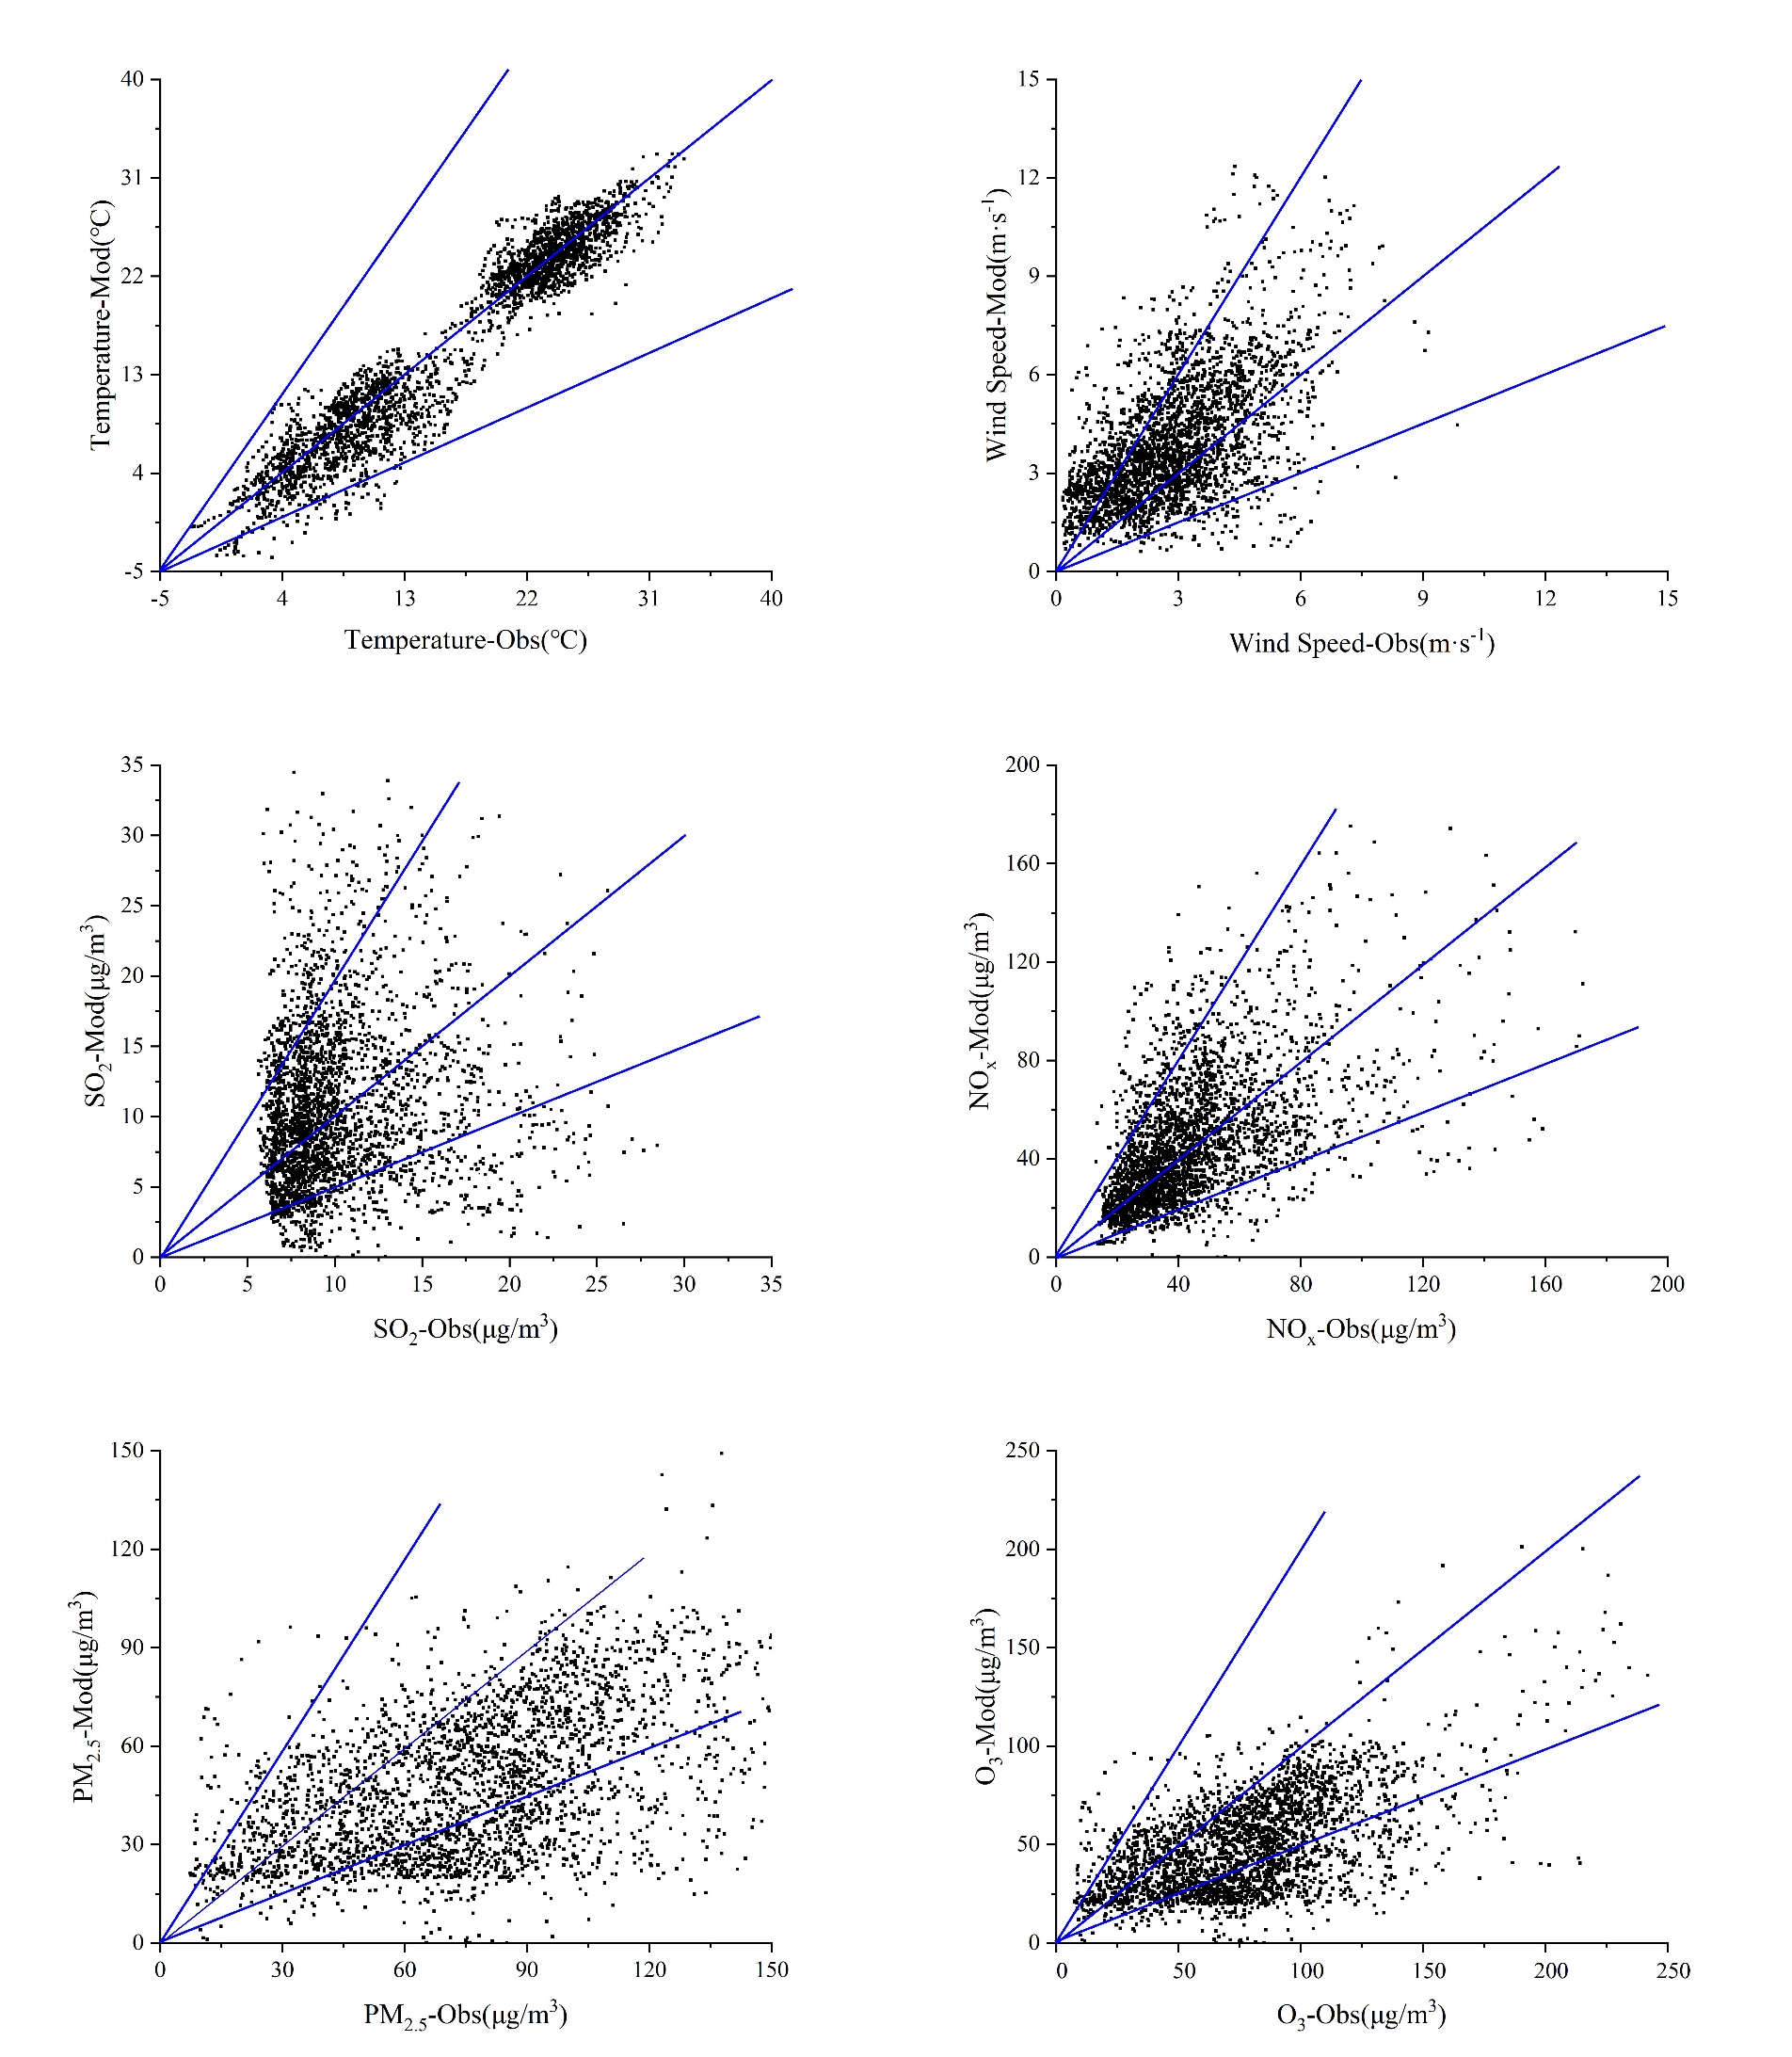


Fig. S2. Scatter diagram of hourly forecast and observation value of meteorological and air quality factors (three lines represent 2:1, 1:1, and 1:2)


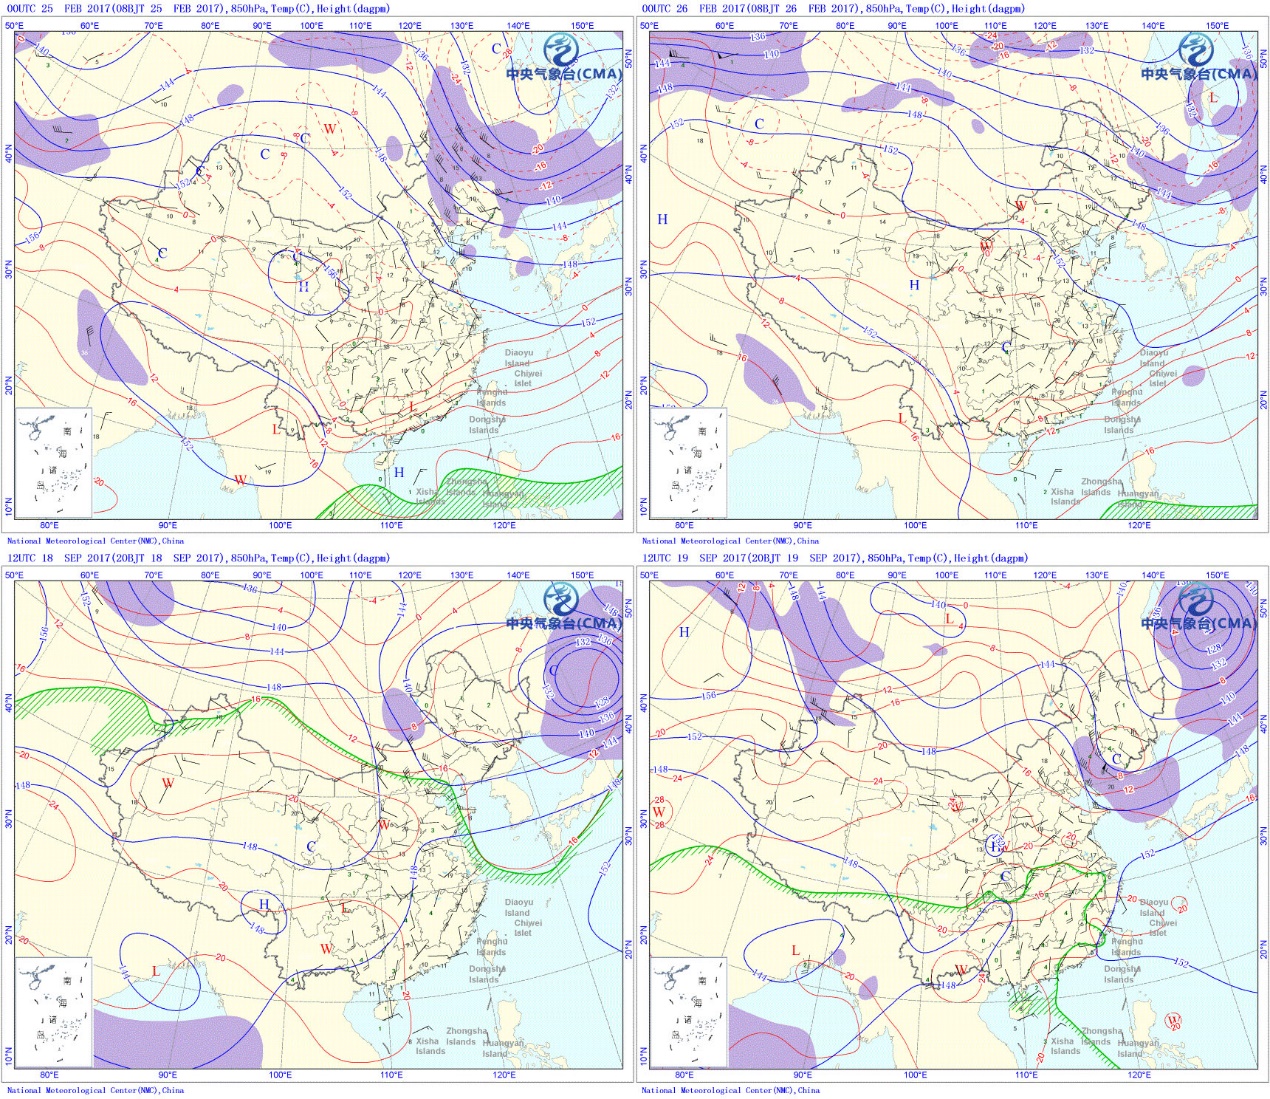


Fig. S3 Map of the synoptic pattern at 500hPa in February and September cases


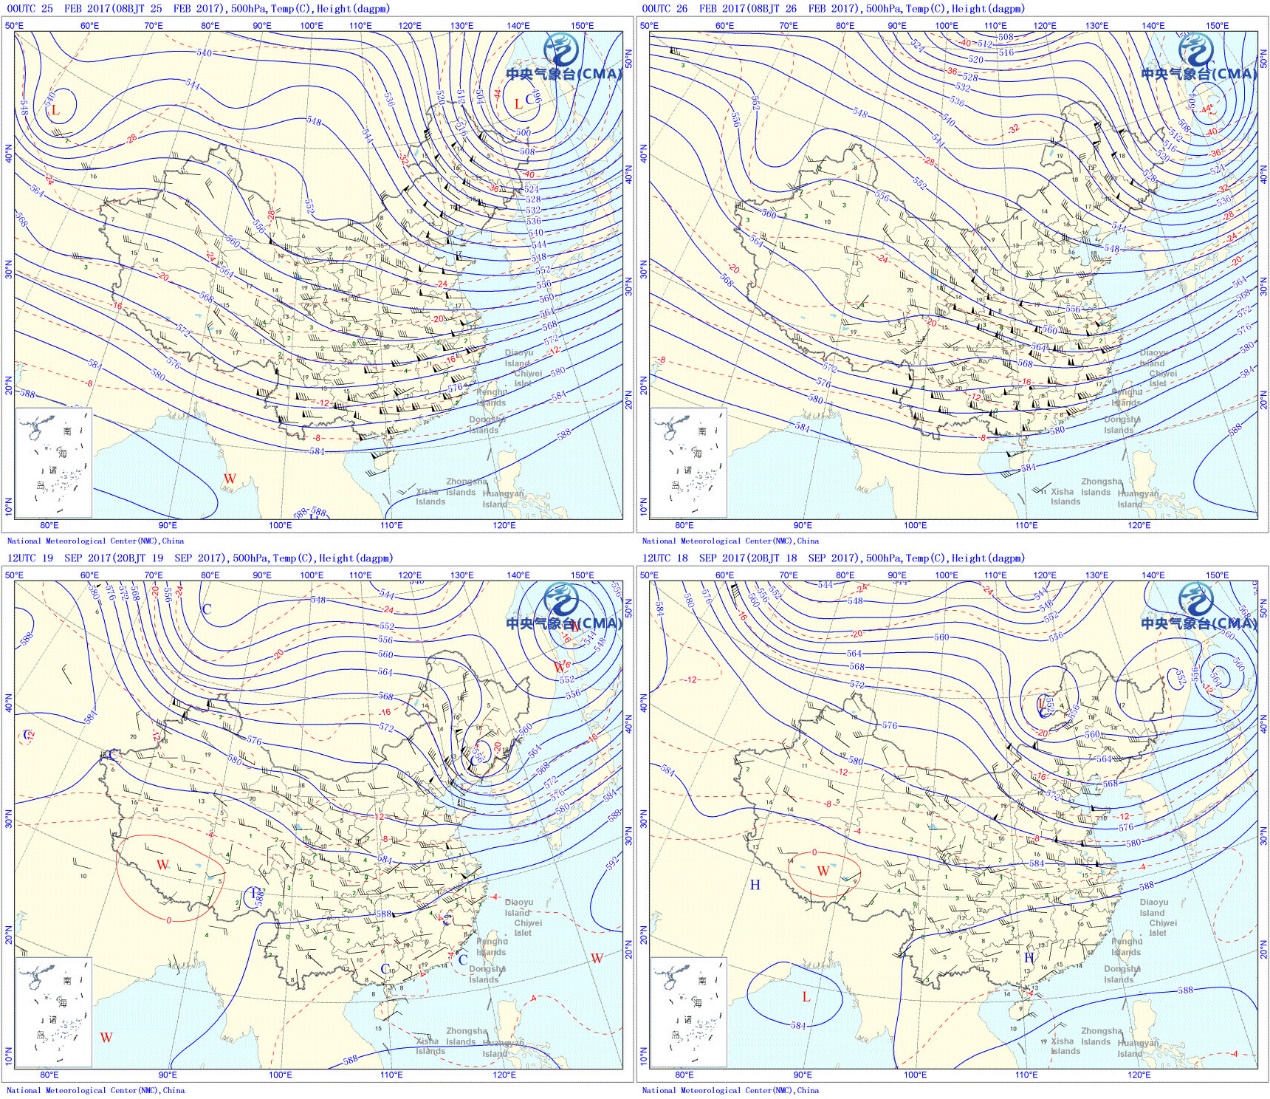


Fig. S4 850hPa map of typical time in February and September cases


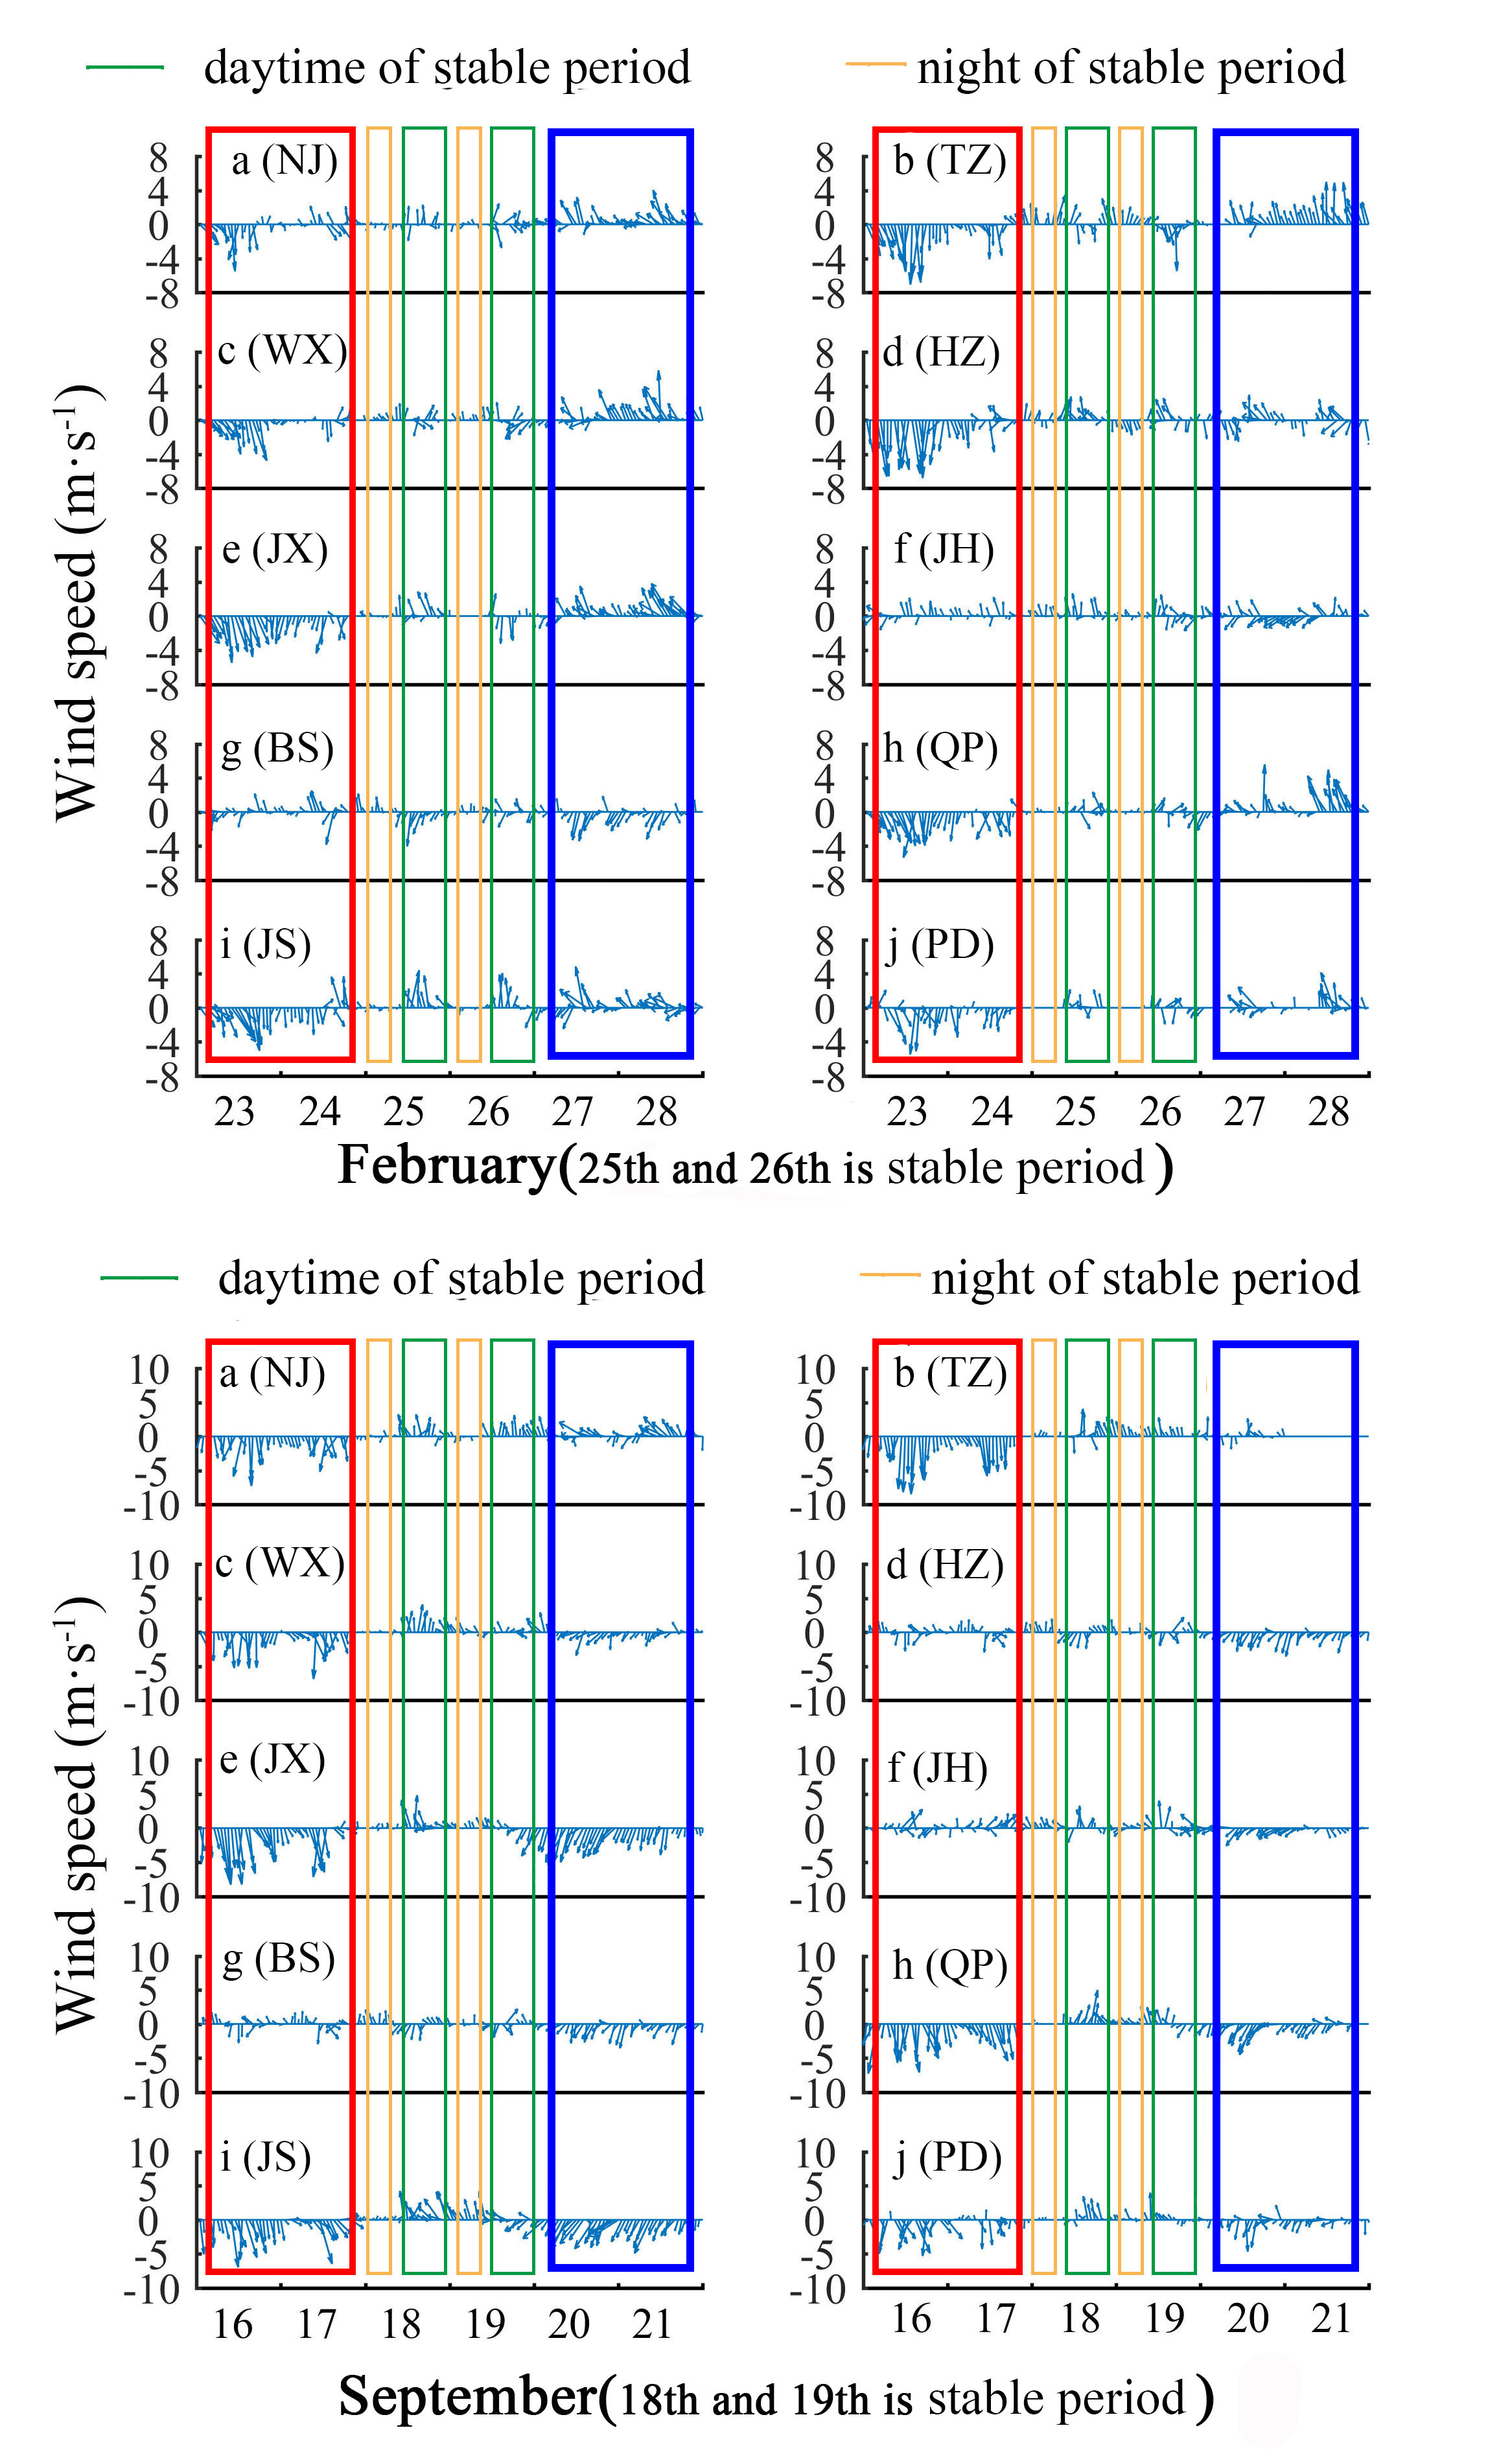


Fig. S5. The wind vectors of Shanghai and its surrounding cities in February and September 2017 during the stable weather accumulation stage (red box), stagnation stage (yellow box), maintenance stage (green box) and dilution stage (blue box) (a: Nanjing, Jiangsu; b: Tongzhou, Jiangsu; c: Wuxi, Jiangsu; d: Hangzhou, Zhejiang; e: Jiaxing, Zhejiang; f: Jinhua, Zhejiang; g: Baoshan, Shanghai; h: Qingpu, Shanghai; i: Jinshan, Shanghai; j: Pudong, Shanghai)


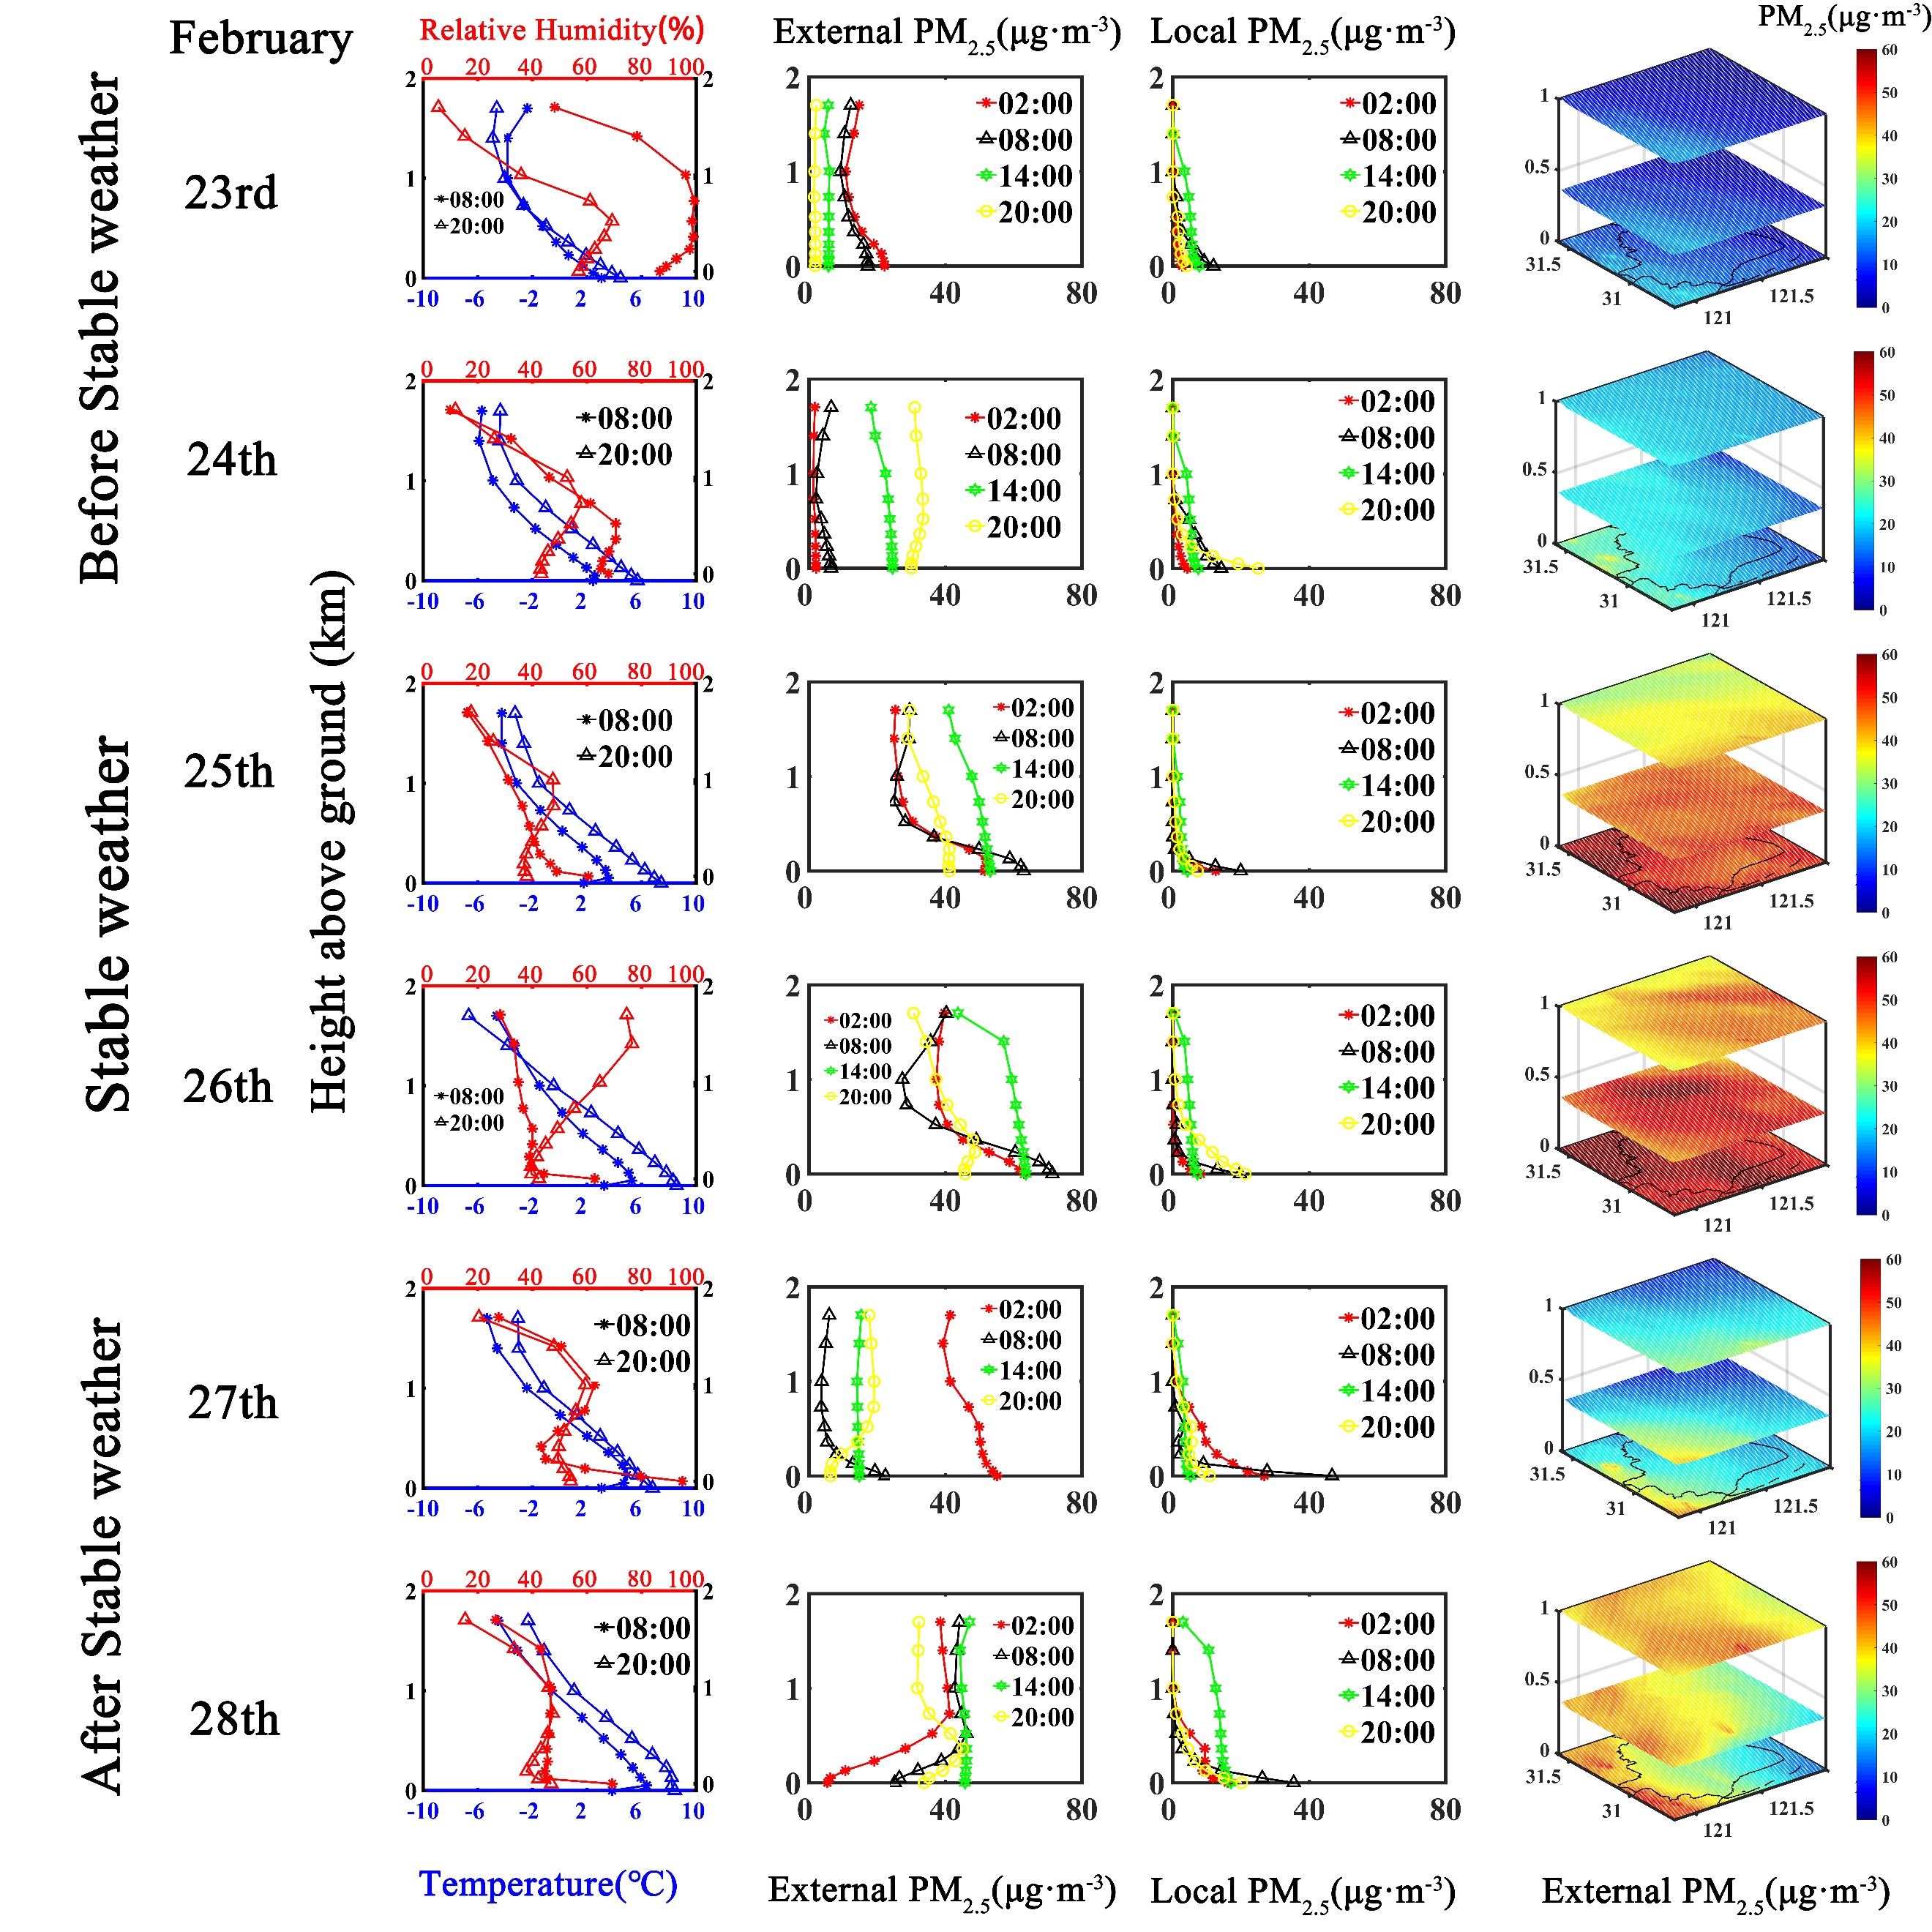


Fig. S6 *Simulated meteorological conditions (temperature and relative humidity) and simulated local and external PM2.5 vertical profiles and vertical spatial distribution before and after the stable weather in February 2017*
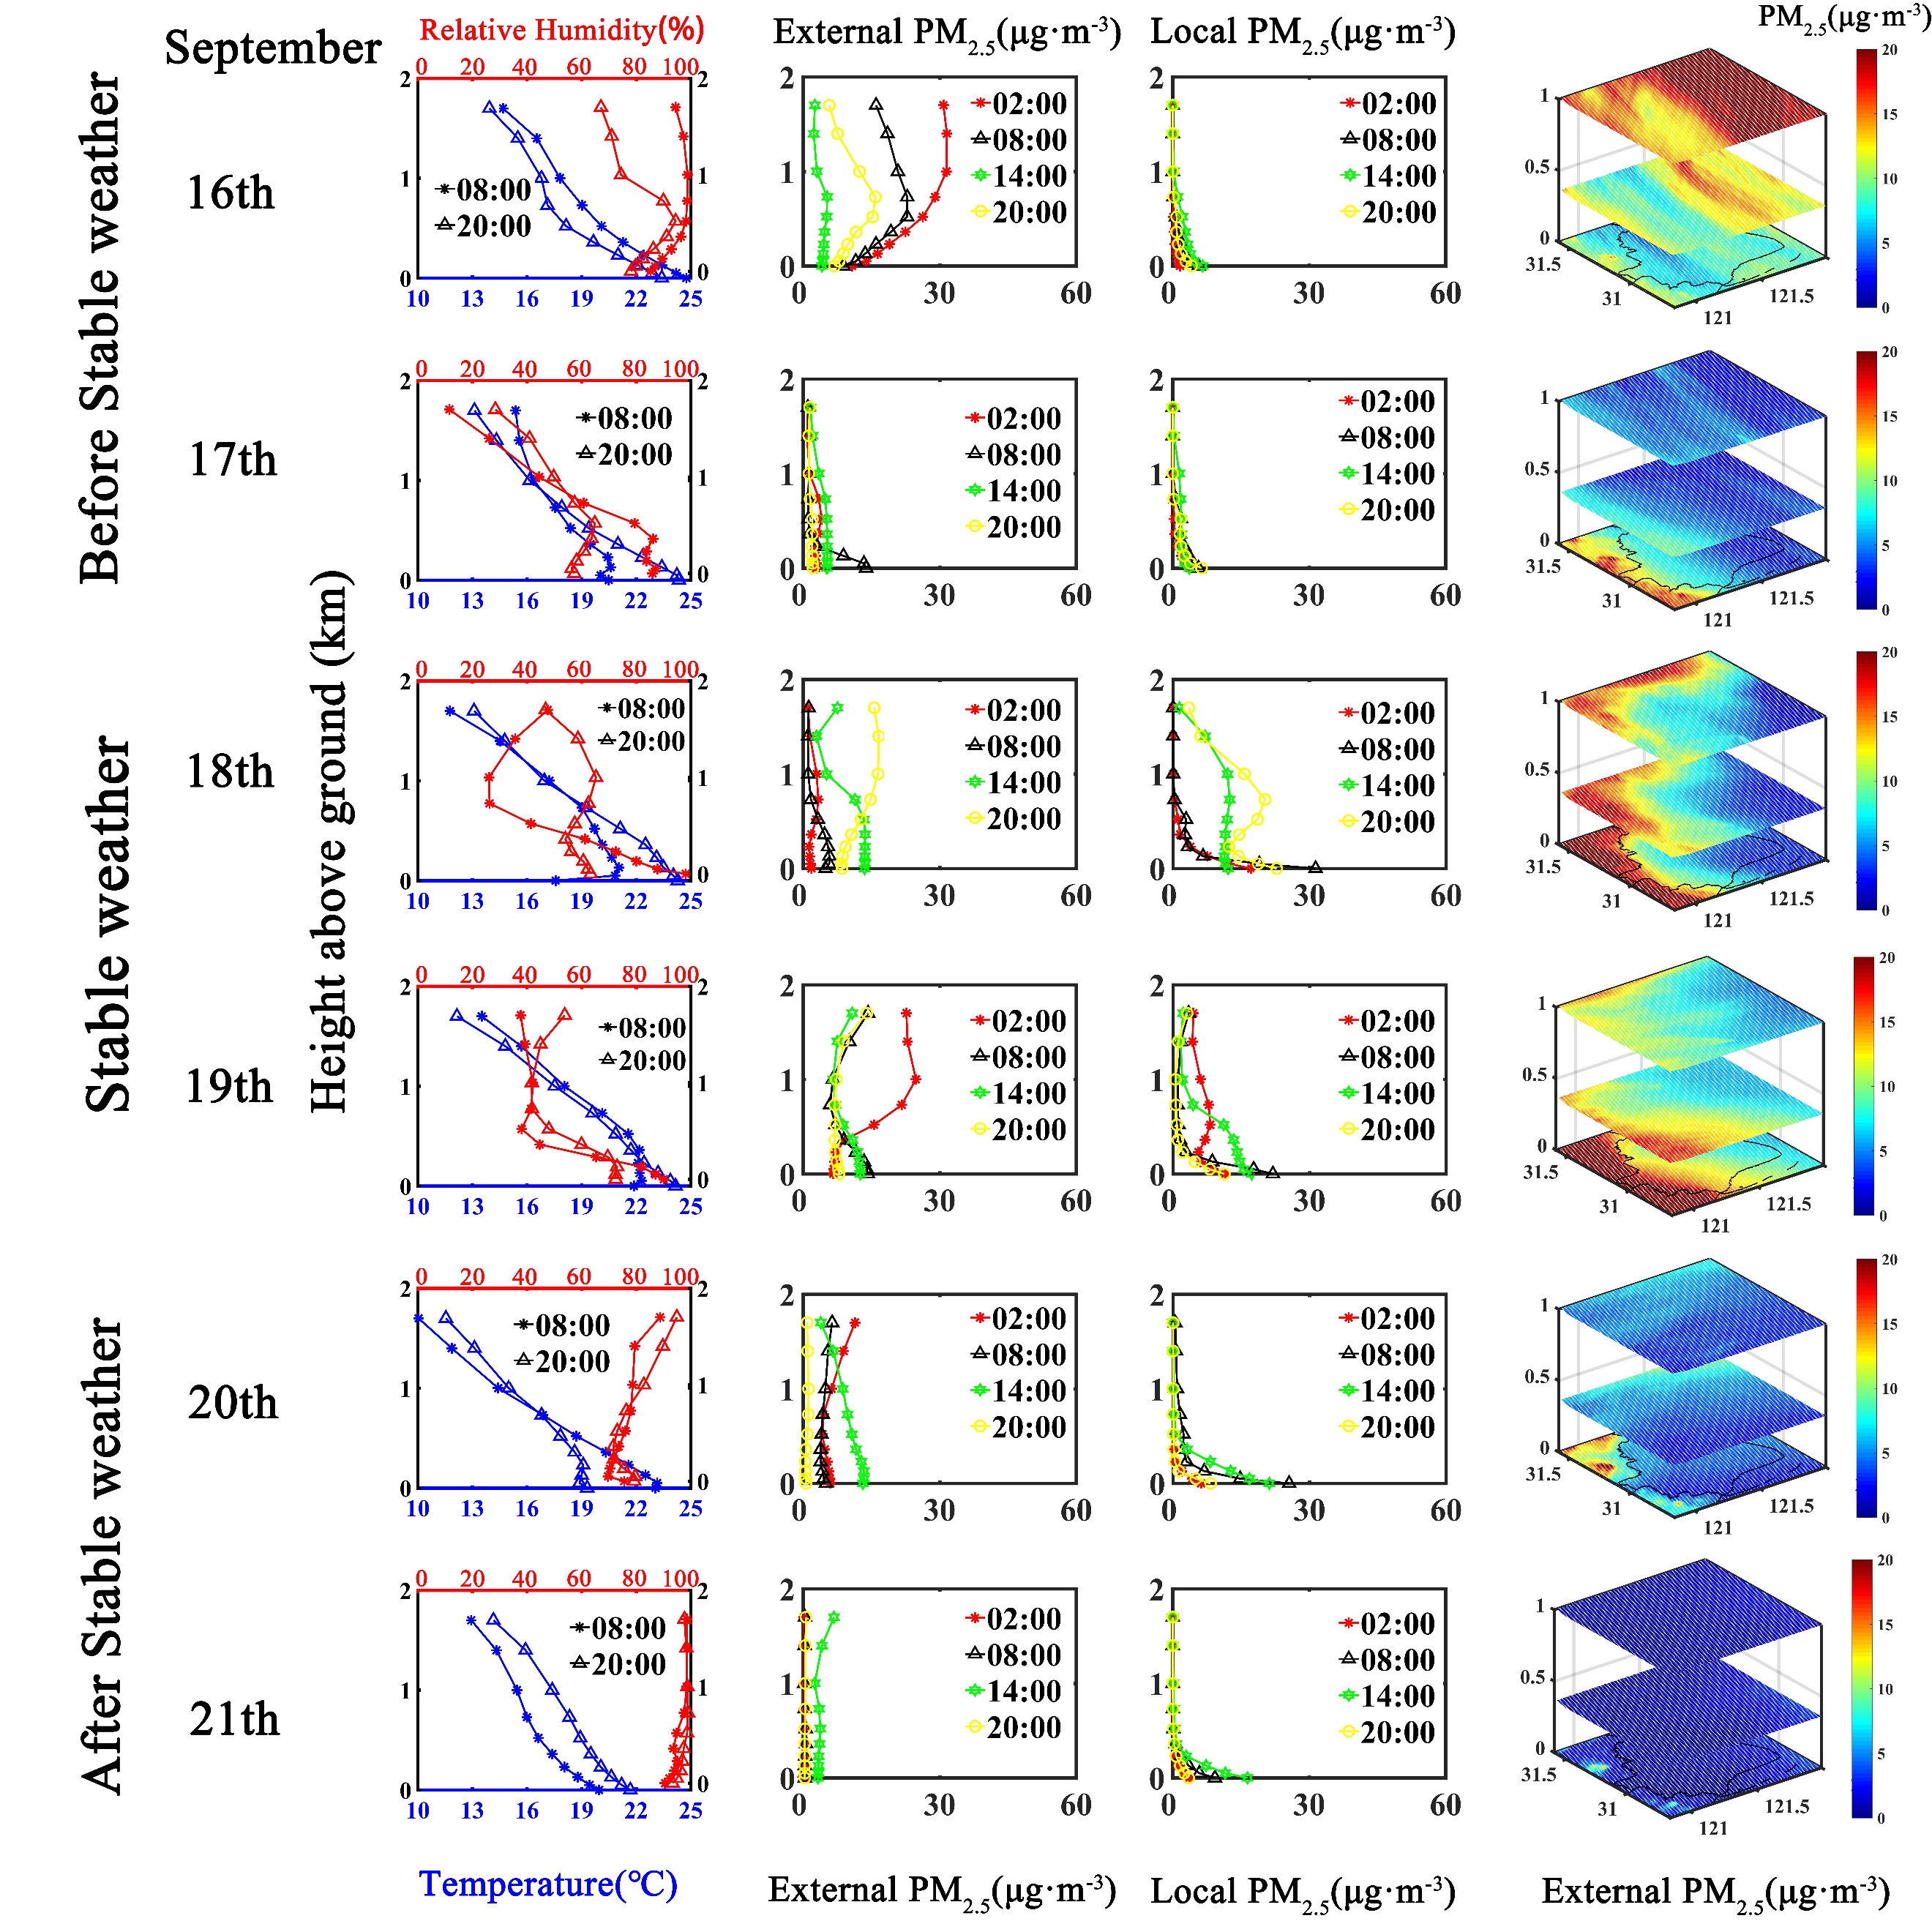


Fig. S7 *Simulated meteorological conditions (temperature and relative humidity) and simulated local and external PM2.5 vertical profiles and vertical spatial distribution before and after the stable weather in September 2017*


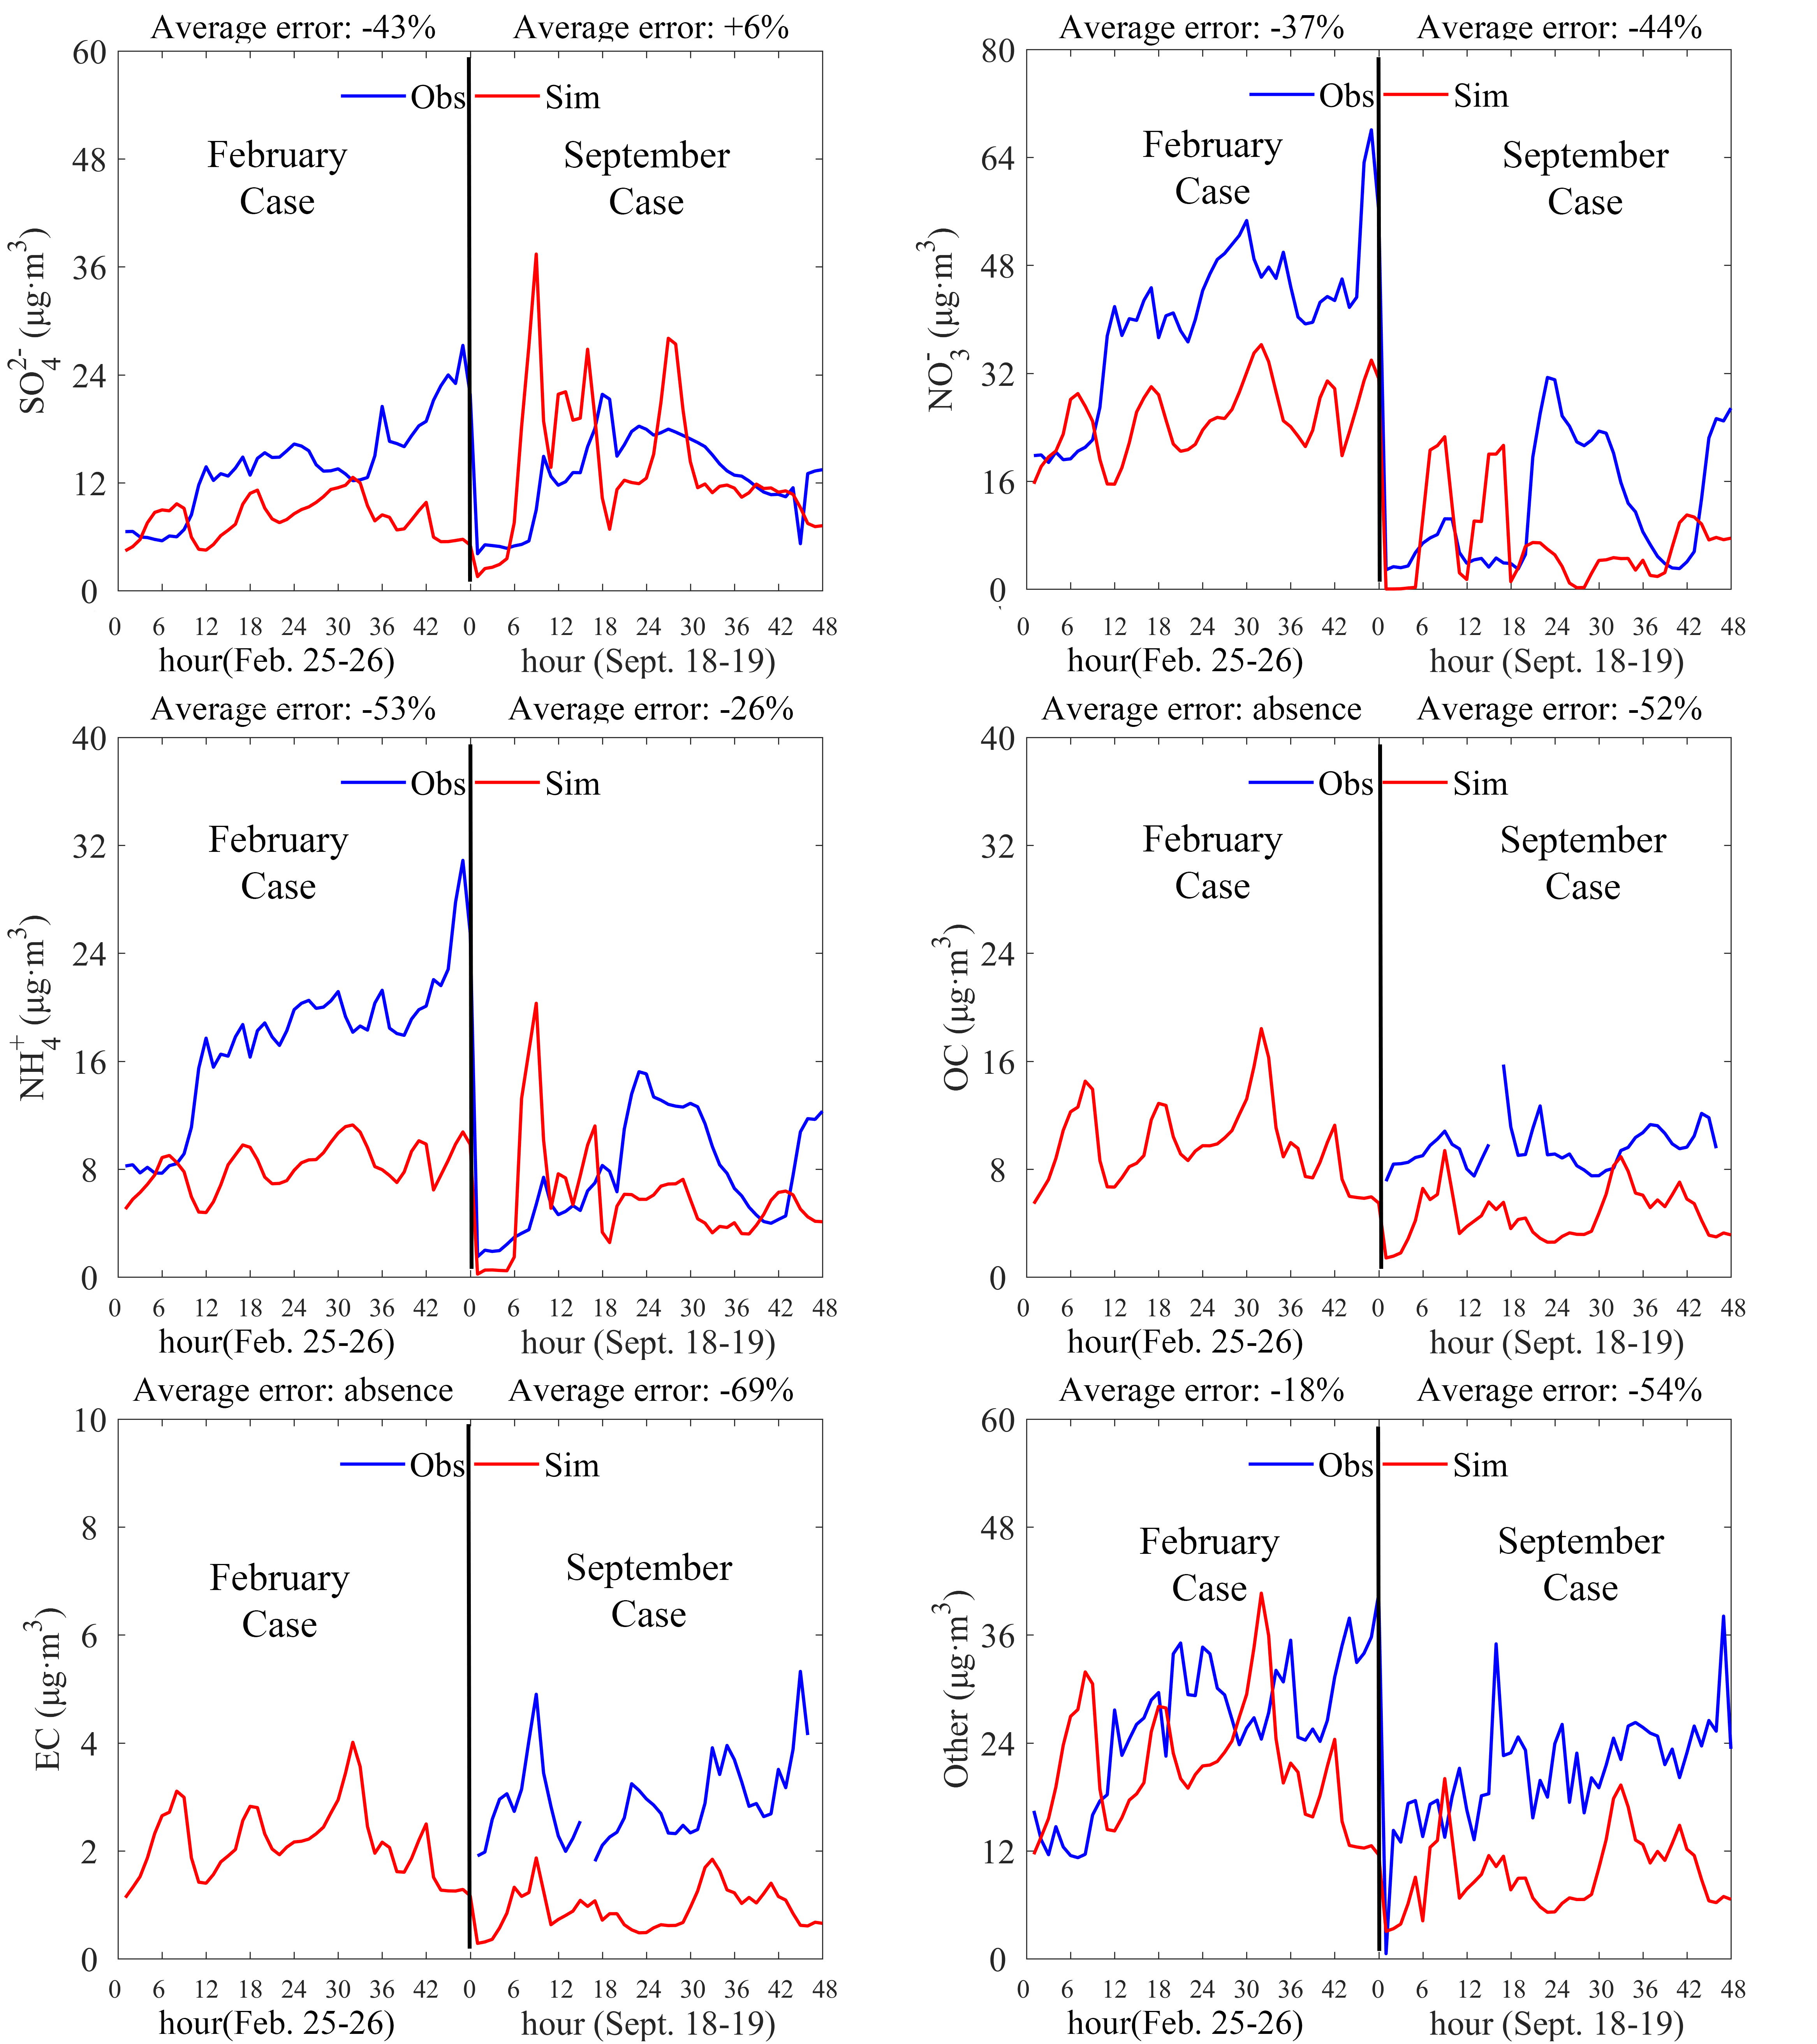


Fig. S8 *The concentration of PM2.5 components at Pudong Monitoring Station*
